# Supplementary material
Source: ML conference proceedings conference paper supplement (https://openreview.net/forum?id=9jJP2J1oBP)
Supplement: supplementary_material [file attachment]

|     |                                                                     |           |
|-----|---------------------------------------------------------------------|-----------|
| 378 | <b>A Details of Agents</b>                                          | <b>13</b> |
| 379 | A.1 DTQN, TSAC . . . . .                                            | 13        |
| 380 | A.2 ZP-DRQN, ZP-RSAC . . . . .                                      | 13        |
| 381 | A.3 BA-DTQN, BA-TSAC . . . . .                                      | 13        |
| 382 | A.4 UA-DTQN, UA-TSAC . . . . .                                      | 14        |
| 383 | A.5 B-DQN, B-SAC . . . . .                                          | 14        |
| 384 | A.6 Hyper-parameters . . . . .                                      | 15        |
| 385 | A.7 Network Structures . . . . .                                    | 16        |
| 386 | <b>B Details of Domains</b>                                         | <b>18</b> |
| 387 | B.1 Sphinx . . . . .                                                | 18        |
| 388 | B.2 CarFlag-2D . . . . .                                            | 18        |
| 389 | B.3 Heaven-Hell . . . . .                                           | 19        |
| 390 | B.4 Robot Domains . . . . .                                         | 19        |
| 391 | <b>C Representations Training Details</b>                           | <b>21</b> |
| 392 | C.1 Training Data Generation . . . . .                              | 21        |
| 393 | C.2 Network Architecture . . . . .                                  | 21        |
| 394 | C.3 Mutual Information Estimation . . . . .                         | 21        |
| 395 | C.3.1 Minimizing $I(z^s; z^o)$ . . . . .                            | 21        |
| 396 | C.3.2 Maximizing $I(o; z^o)$ and $I(s; z^s)$ . . . . .              | 23        |
| 397 | C.4 Hyper-parameters . . . . .                                      | 23        |
| 398 | <b>D Additional Experiments</b>                                     | <b>24</b> |
| 399 | D.1 Using $z^s \oplus z^o$ versus $z^s$ for Task Learning . . . . . | 24        |
| 400 | D.2 Using Only Auxiliary Task/Intrinsic Rewards . . . . .           | 24        |
| 401 | D.3 Using GRU v.s. GPT . . . . .                                    | 25        |
| 402 | D.4 Visualization of Intrinsic Rewards . . . . .                    | 25        |
| 403 | <b>E Details of Hardware Experiments</b>                            | <b>25</b> |
| 404 | E.1 Obtaining Depth Images . . . . .                                | 25        |
| 405 | E.2 Added Perlin Noise for Better Sim-To-Real Transfers . . . . .   | 26        |
| 406 | <b>F Details of SO(2) Rotational Augmentation</b>                   | <b>26</b> |

## 407 A Details of Agents

### 408 A.1 DTQN, TSAC

409 These are variants of DQN and SAC, made memory-based by using a transformer as the sequence model as shown in Fig. 8 and Fig. 9. Similar models have been explored in recent work [21, 22].

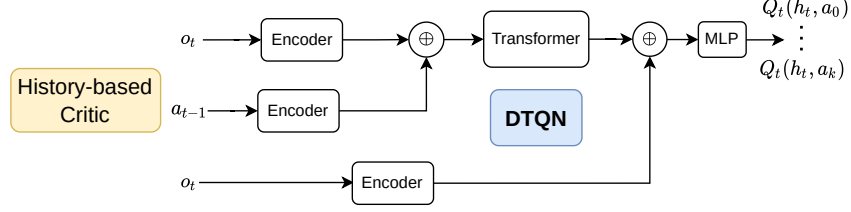

Figure 8: Architecture of DTQN.

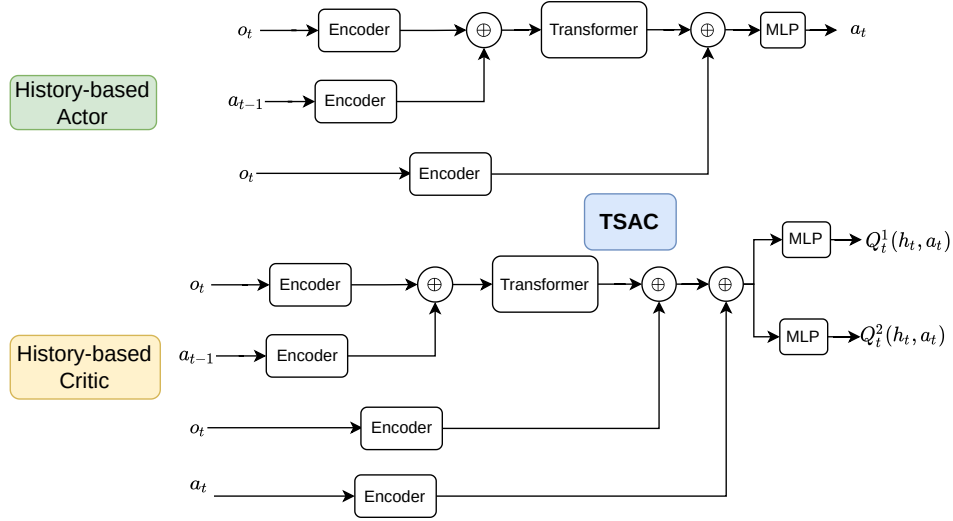

Figure 9: Architecture of TSAC.

410

### 411 A.2 ZP-DRQN, ZP-RSAC

412 These agents [41] are similar to DTQN and TSAC, except they use a recurrent sequence model instead of a transformer. Importantly, using a *recurrent* sequence model (e.g., a GRU [42]) is required (see [41]). Additionally, these agents are regularized with a self-predictive auxiliary task of predicting the next latent state  $z$  from a history  $h$ . Specifically, given a recurrent encoder  $f_\phi : \mathcal{H} \rightarrow \mathcal{Z}$  and a latent dynamics model  $g_\theta : \mathcal{Z} \times \mathcal{A} \rightarrow \mathcal{Z}$ , the auxiliary task is to minimize:

$$416 \quad \mathcal{L}_{\text{aux}} = \|g_\theta(f_\phi(h), a) - f_{\bar{\phi}}(h')\|_2^2, \quad (6)$$

417 where  $\bar{\phi}$  is the target network of  $\phi$ .

### 418 A.3 BA-DTQN, BA-TSAC

419 In BA-DTQN [6] (see Fig. 10), a state-based critic  $Q(s, a)$  and a history-based critic  $Q(h, a)$  are learned to leverage the state availability during training but not during execution (i.e., we cannot use  $Q(s, a)$  during execution). Unfortunately, as in [6],  $Q(s, a)$  is not mathematically well-defined and generally a biased estimate of  $Q(h, a)$ , which is used to select actions during execution.

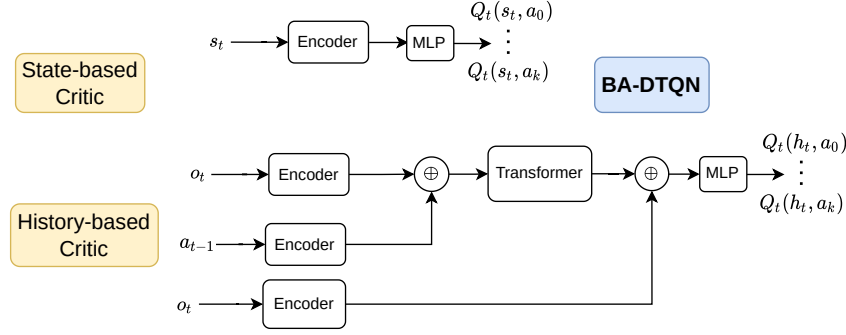

Figure 10: Architecture of BA-DTQN.

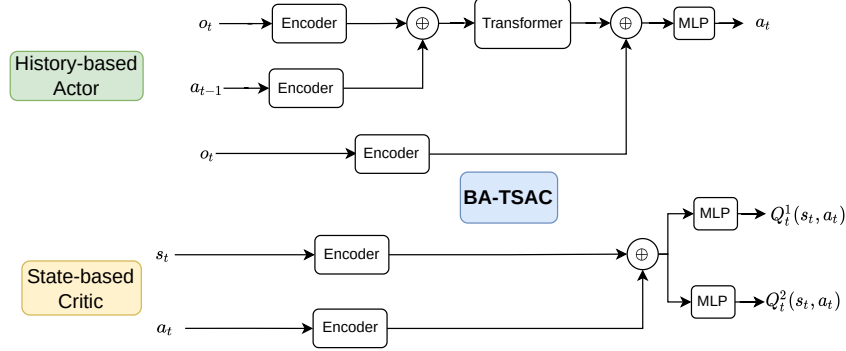

Figure 11: Architecture of BA-TSAC.

423 The difference between BA-TSAC (see Fig. 11) and TSAC is that the critic is trained additionally  
 424 using state input during training. Specifically, we learn a state-based critic  $Q(s, a)$  instead of the  
 425 history-based  $Q(h, a)$ . Similar to BA-DTQN, BA-TSAC also has bias. For BA-TSAC, during  
 426 execution, actions are computed using a history-based actor.

#### 427 A.4 UA-DTQN, UA-TSAC

428 In UA-DTQN [6] (see Fig. 12), a history-state-based critic  $Q(h, s, a)$  and a history-based critic  
 429  $Q(h, a)$  are learned. Unlike BA-DTQN with  $Q(s, a)$ ,  $Q(s, h, a)$  can be well-defined and has been  
 430 proven to be an unbiased estimate of  $Q(h, a)$ . During execution, actions are selected from  $Q(h, a)$ .

431 Unlike BA-TSAC, UA-TSAC [9] (see Fig. 13) combines *both* state and history features to train the  
 432 critic, i.e., we learn a history-state-based critic  $Q(s, h, a)$ . Similar to UA-DTQN, UA-TSAC does  
 433 not introduce learning bias. During execution, actions are computed from a history-based policy.

#### 434 A.5 B-DQN, B-SAC

435 The architectures of these agents are depicted in Fig. 14. These agents are based on Believer [8],  
 436 which leveraged the state availability to train an agent in three stages:

437 **Stage 1.** Learning compact state representations with state-labeled transitions, i.e., a batch of sam-  
 438 ples  $(s, o, a, r, s', o')$ . This stage is similar to our first stage (see Algorithm 1) but without the  
 439 information-based regularizations. Instead, the authors proposed to regularize the KL divergence  
 440  $\text{KL}[\phi(s) \parallel \mathcal{N}(0, 1)]$  to avoid overlapping features between  $\phi(s)$  and  $\psi(o)$  by giving penalty when-  
 441 ever  $\phi(s)$  is used to derive features. This, however, does not avoid the overlapping issue between  
 442 learned state and observation features, as shown in our experiment (see Fig. 4).

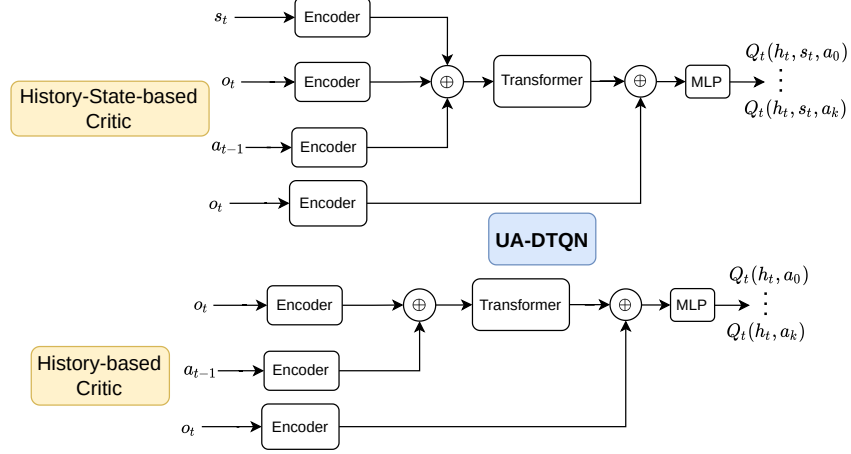

Figure 12: Architecture of UA-DTQN.

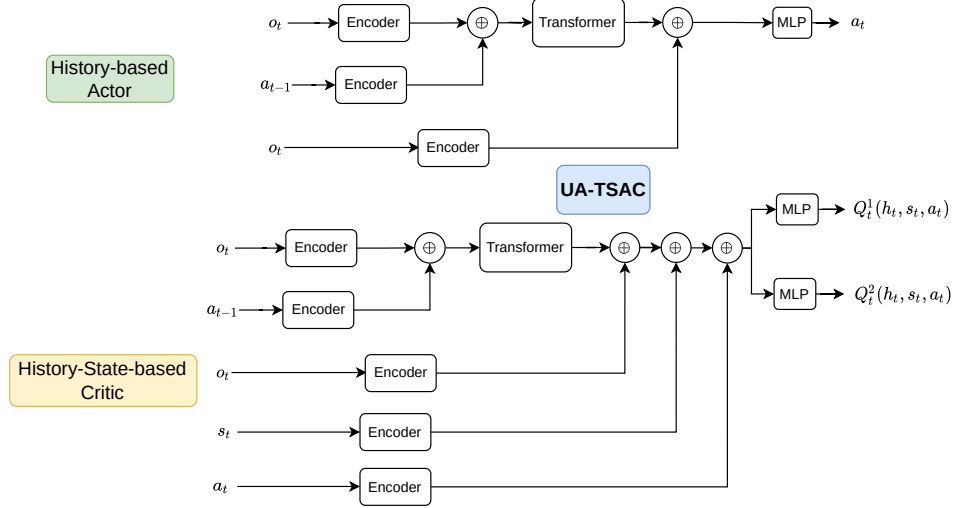

Figure 13: Architecture of UA-TSAC.

443 **Stage 2.** Learn a recurrent history model  $p(\phi(s)|h)$  with variational autoencoders [46] (VAE) by  
 444 maximizing the joint log-likelihood  $p(\phi(s), h)$  averaged over  $(s, h)$  samples.

445 **Stage 3.** Use the history module  $p(\phi(s)|h)$  for task learning. First, samples are drawn from the  
 446 VAE to derive a history summary. Then, this summary is used as the “states” for task learning using  
 447 memoryless RL algorithms. The authors optionally fine-tune  $p(\phi(s)|h)$  with the on-policy data.

448 As the original paper applied their method for PPO [47], which is on-policy, we had to modify the  
 449 method to apply to DQN and SAC, resulting in B-DQN and B-SAC. In Stage 2, to fairly compare  
 450 with other baselines, we replace GRU in the history model with the GPT model used in other base-  
 451 lines. Moreover, in Stage 3, we fine-tuned the history module for every domain (as used in the  
 452 original code). Finally, the sequence model of B-SAC is shared between the actor and the critic,  
 453 following the original code.

#### 454 A.6 Hyper-parameters

455 For DDQN [39], we use an epsilon-greedy exploration strategy with a linear schedule, starting at  
 456  $\epsilon = 1.0$  and ending at  $\epsilon = \frac{1}{T}$  with  $T$  being the episode length. The schedule time is equal to 10% of  
 457 the total training timesteps. We use a batch size of 64 episodes.

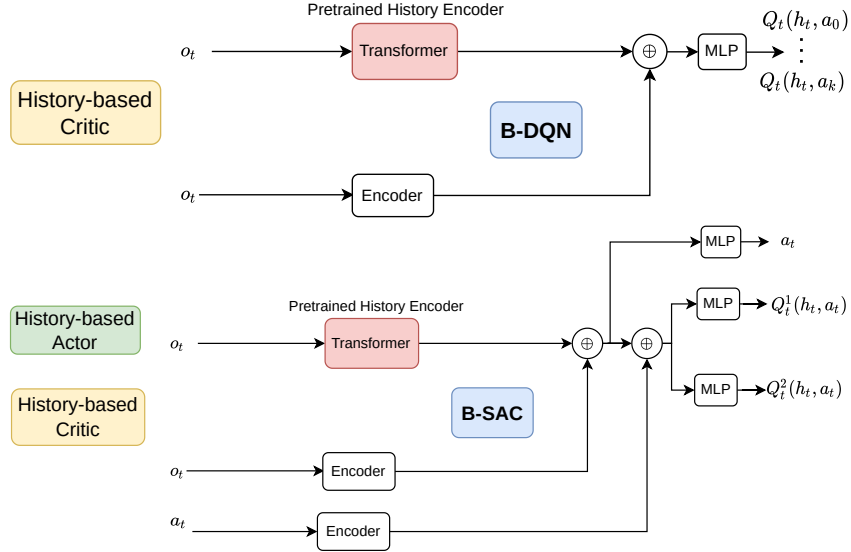

Figure 14: Architectures of B-DQN and B-SAC with a pre-trained history encoder from Believer [8]. We change the history encoder from GRU-based to transformer-based for a fair comparison with other agents. For B-SAC, we use a shared history module, similar to the original code.

For continuous actions, we use SAC [40]. We automatically tune the entropy temperature, initializing at 0.01. The chosen target entropy is equal to the negation of the action dimension. We use the discount factor  $\gamma = 0.99$ . We use a batch size of 64 episodes.

Other hyper-parameters are in Table 2 with shared parameters and ones specific for each agent.

Table 2: Hyper-parameters used for RL agents. HH: Heaven-Hell, S: Sphinx, CF: CarFlag-2D.

| Agent        | Hyper-parameter             | Value                                      |
|--------------|-----------------------------|--------------------------------------------|
| Shared       | Episode Length              | 50                                         |
|              | Discount Factor             | 0.99                                       |
|              | Replay Buffer Size          | 1M: discrete domains, 100k: robot domains  |
|              | Target Update Rate          | 0.005                                      |
|              | Actor Learning Rate         | 3e-4                                       |
|              | Critic Learning Rate        | 3e-5: CF and S; 3e-4: other                |
|              | Batch size                  | 64                                         |
| SAC          | Initial Entropy Temperature | 0.01                                       |
|              | Update Per Step             | 0.25: discrete domains, 1.0: robot domains |
| ZP-DRQN      | Loss weighting              | 1.0: discrete domains, 0.1: robot domains  |
| Ours         | Loss Weighting              | 0.5 for all domains                        |
|              | Reward Weighting            | 10.0: HH, S, 0.1: robot domains, 0.0: CF   |
| B-DQN, B-SAC | Latent Dimension            | 32                                         |
|              | X-Dim                       | 16                                         |
|              | Z-Dim                       | 16                                         |

## A.7 Network Structures

We use the following acronyms: **FC**( $n$ ): a fully connected layer with  $n$  outputs; **Conv**( $f, s$ ): a convolutional layer with filter size  $f \times f$  and stride  $s$ ; **R**: the ReLU activation function; **MaxPool**( $w$ ): a max pooling layer with window size  $w$ ; **T**( $H, N, HS, D$ ): Transformer with  $H$  heads,  $N$  layers, hidden size  $HS$ , and the dropout rate  $D$ ; **GRU**( $N, HS$ ): GRU with  $N$  layers and hidden size  $HS$ .

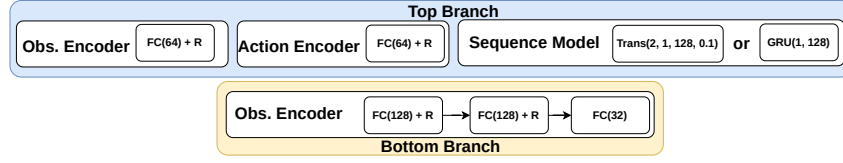

Figure 15: Network structures used in Heaven-Hell.

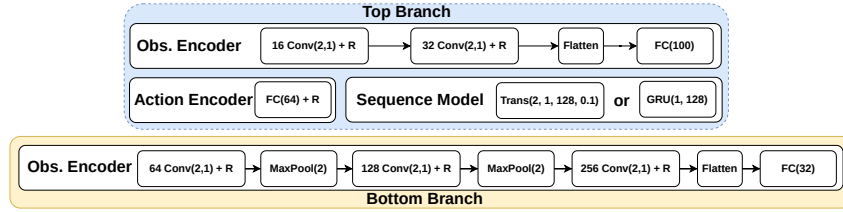

Figure 16: Network structures used in CarFlag-2D.

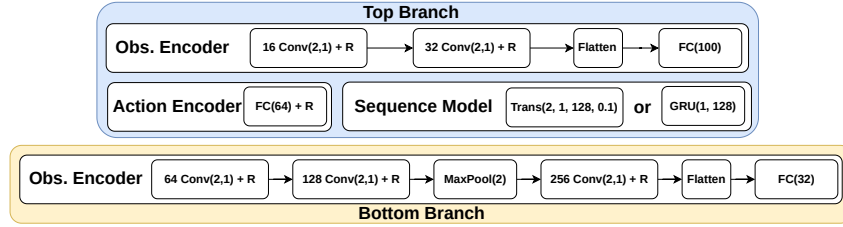

Figure 17: Network structures used in Sphinx.

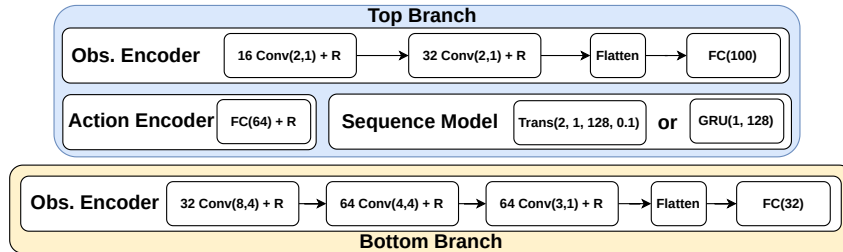

Figure 18: Network structures used in robot domains.

## B Details of Domains

### B.1 Sphinx

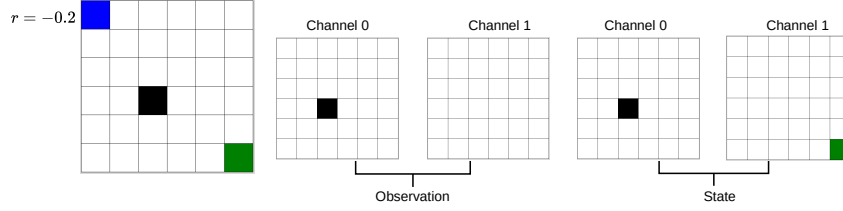

Figure 19: Sphinx domain with two-channeled pixel-based observations and states. Channel 1 of the observation reveals the goal cell (green) only when the agent enters the blue cell. In contrast, the same channel of the state always reveals the goal cell regardless of the agent’s position.

In this domain (see Fig. 19), an agent must visit the goal cell, which can be in one of three corners except the top-left one. The agent must visit the information cell (blue) at the top-left corner to know the current corner of the goal. However, there is a cost when going to the information cell.

**Action.** Move-Right, Move-Left, Move-Up, Move-Down

**Observation.** A  $6 \times 6 \times 2$  image with the first channel encodes the agent’s position and the second encodes the goal’s position. The second channel only contains the goal information when the agent enters the blue cell.

**State.** A state has the same structure as an observation, but the second channel always contains the goal information.

**Reward.** +1 when reaching the goal,  $-0.2$  when visiting the information cell, and 0 otherwise.

### B.2 CarFlag-2D

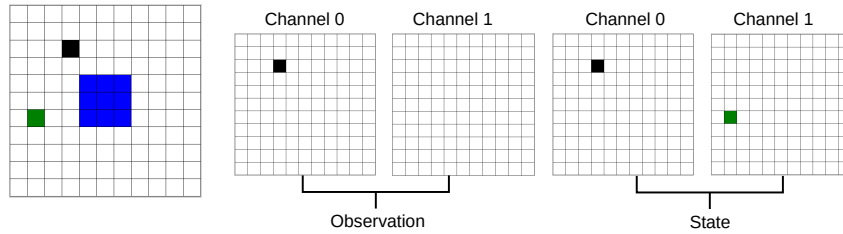

Figure 20: CarFlag-2D domain with two-channeled pixel-based observations and states. Channel 1 of the observation reveals the goal cell only when the agent enters the blue region. In contrast, the same channel of the state always reveals the goal cell.

In this domain (see Fig. 20), an agent must visit the goal cell (green) to finish the task. The goal cell, however, is only present in the observation when the agent visits the information region (blue).

**Action.** Move-Right, Move-Left, Move-Up, Move-Down

**Observation.** A  $11 \times 11 \times 2$  image with the first channel encodes the agent’s position, and the second encodes the goal’s position. The second channel only contains the goal information when the agent enters the blue region.

**State.** A state has the same structure as an observation, but the second channel always contains the goal information.

**Reward.** +1 when reaching the goal, and 0 otherwise.

### 489 B.3 Heaven-Hell

490 In this domain, an agent must visit heaven (green cell) to finish the task. The goal cell can be either  
 491 on the left or on the right side with 50% probability. To observe the side of the goal (left or right),  
 the agent must visit the priest, who resides in the bottom right corner.

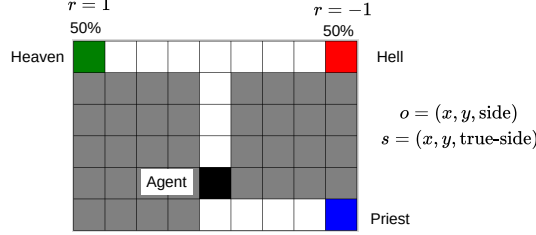

Figure 21: The Heaven-Hell domain with vector-based observations and states.

492

493 **Action.** Move-Right, Move-Left, Move-Up, Move-Down

494 **Observation.** A vector consists of the agent's position and the side information. The side informa-  
 495 tion can take the value of 0 (no information), 1 (heaven on the right), or  $-1$  (heaven on the left).

496 **State.** Like the observation, but the true side of the goal is always revealed.

497 **Reward.**  $+1$  when reaching heaven,  $-1$  when reaching hell, and  $0$  otherwise.

### 498 B.4 Robot Domains

499 In these domains, the agent must manipulate the only movable object among two objects, which are  
 500 exactly the same under the top-down depth image observation.

501 **Action.** An action  $a = (\delta_x, \delta_y, \delta_z, \delta_r)$ , where  $\delta_{xyz} \in [-0.05, 0.05]$  are the displacements of the  
 502 gripper in the XYZ axes, and  $\delta_r \in [-\pi/8, \pi/8]$  is the angular rotation around the Z axis.

503 **Observation.** All robot domains share the same observation: the top-down depth image taken from  
 504 the camera centered at the gripper's position. Two fingers of the gripper are projected on the image.

505 **State.** The state also has two channels. The first channel is the first top-down depth image of the  
 506 observation. While the second channel of the observation is non-informative, the second channel  
 507 of the state is an image that masks everything except the movable object (see Fig. 22) in which the  
 508 movable objects are colored red for visualizations).

509 **Reward.** In Block-Pulling, the agent receives a reward of  $1.0$  only when the two blocks are in  
 510 contact. In Block-Pushing, the agent receives a reward of  $1.0$  only when the movable block is  
 511 within  $5$  cm from the center of the goal pad. In Drawer-Opening, the agent receives a reward of  
 512  $1.0$  only when the unlocked drawer is opened more than  $5$  cm.

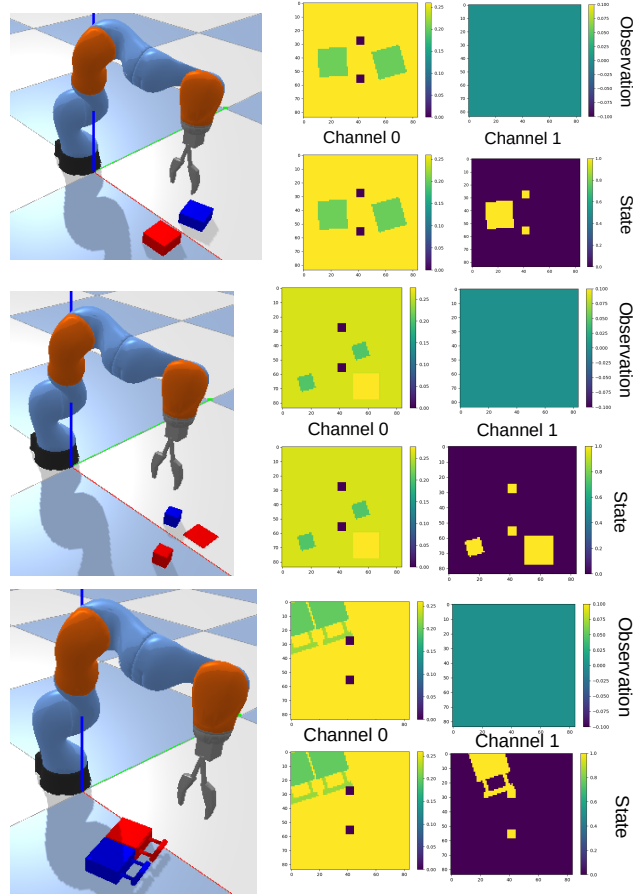

Figure 22: Visualization of an observation and a state in Block-Pulling, Block-Pushing, and Drawer-Opening. The movable object is the red one. The state and the observation have two channels, the first being the top-down depth image. In Block-Pulling, the second channel of the state reveals the movable object and the gripper. In Block-Pushing, the second channel reveals the movable block, the gripper, and the goal pad. In Drawer-Opening, the second channel in the state reveals the unlocked drawer and the gripper.

## C Representations Training Details

### C.1 Training Data Generation

Heaven-Hell, CarFlag-2D, Sphinx: In these domains, we use a uniform random agent to generate training samples, each is a transition  $(s, o, a, r, s', o')$ . For the number of samples used in each domain, please see Table 3.

In the robot domains, we use the same number of demonstrations (80 episodes) to learn the representations during task learning. Furthermore, we augment the training data using random rotations per transition as used in [48] (also see Appendix F). Finally, we describe the planners used to generate the demonstrations in these domains.

**Planner in Block-Pulling:** The planner randomly selects a block and attempts to pull it to the other block direction until the task is accomplished. If, for a while, the position of the selected block remains unchanged, the planner will move the gripper to the other block and repeat the pulling.

**Planner in Block-Pushing:** A block is randomly chosen and pushed toward the goal pad. If the block’s position remains unchanged for a while, the planner will move the gripper to the other block and resume pushing until the task is finished.

**Planner in Drawer-Opening:** The planner selects a drawer randomly and tries to open it. If the chosen drawer fails to open after a while, the gripper will move to the other drawer and repeat the opening action.

### C.2 Network Architecture

The specific architecture used to learn representations is shown in Fig. 23.

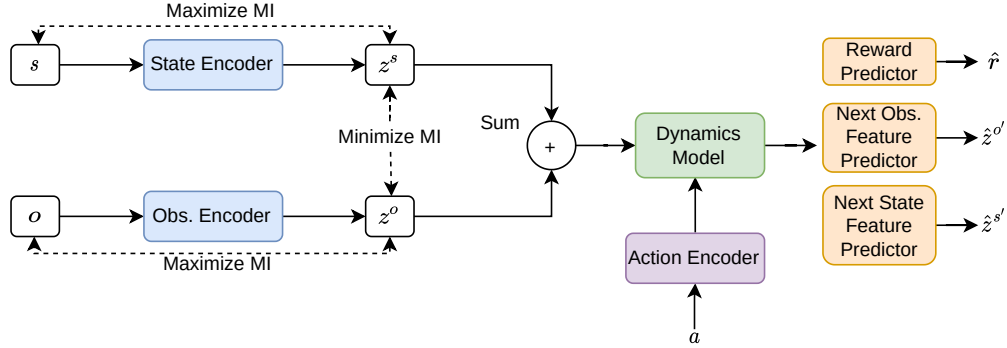

Figure 23: Architecture to learn representations in all domains.

Next, we describe the components for each domain from Fig. 24 to Fig. 27. To succinctly describe the network architecture, we use the following acronyms: **FC**( $n$ ): a fully connected layer with  $n$  outputs; **Conv**( $f, s$ ): a convolutional layer with filter size  $f \times f$  and stride  $s$ , **R** is the ReLU activation, and **MaxPool**( $w$ ): a max pooling layer with window size  $w$ .

### C.3 Mutual Information Estimation

#### C.3.1 Minimizing $I(z^s; z^o)$

From the upper bound equation Eq. (2), we minimize its variational estimate defined below:

$$\mathcal{L}_{\text{CLUB}} = \frac{1}{B^2} \sum_{i=1}^B \sum_{j=1}^B [\log q(z_i^o | z_i^s) - \log q(z_j^o | z_i^s)] \quad (7)$$

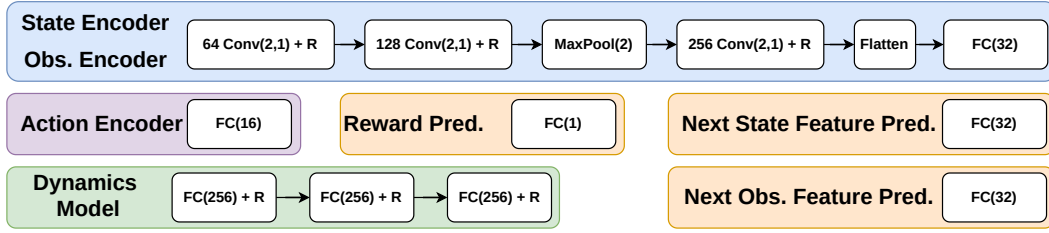

Figure 24: Network architecture in Sphinx.

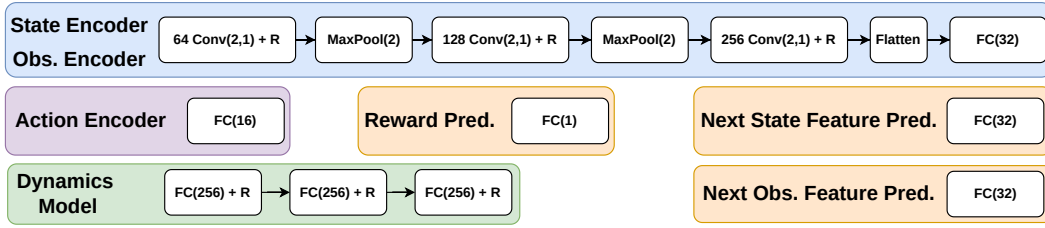

Figure 25: Network architecture in CarFlag-2D.

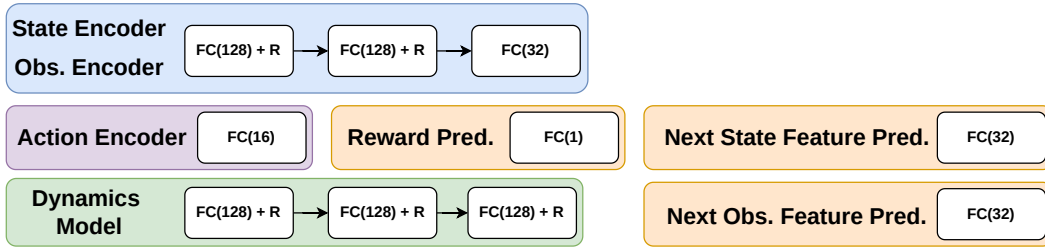

Figure 26: Network architecture in Heaven-Hell.

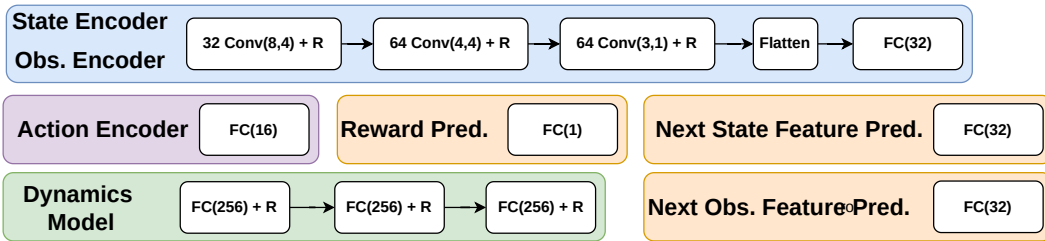

Figure 27: Network architecture in robot domains.

540 The variational distribution  $q(z^o|z^s)$  is updated to minimize  $\mathbb{D}_{\text{KL}}[q(z^o|z^s) \parallel p(z^o|z^s)]$ . We assume  
 541  $q(z^o|z^s)$  follows a Gaussian distribution and use the following network architectures:

542 **Mean network:**  $\text{FC}(32) \rightarrow \mathbf{R} \rightarrow \text{FC}(32)$

543 **Log variance network:**  $\text{FC}(32) \rightarrow \mathbf{R} \rightarrow \text{FC}(32) \rightarrow \text{Tanh}$

544 We use the batch size  $B = 500$  and use a learning rate of 0.001 for all tasks, except Heaven-Hell,  
 545 in which a learning rate of 0.0003 is used. We update  $q$  whenever we update  $\phi(s)$  and  $\psi(o)$ .

### 546 C.3.2 Maximizing $I(o; z^o)$ and $I(s; z^s)$

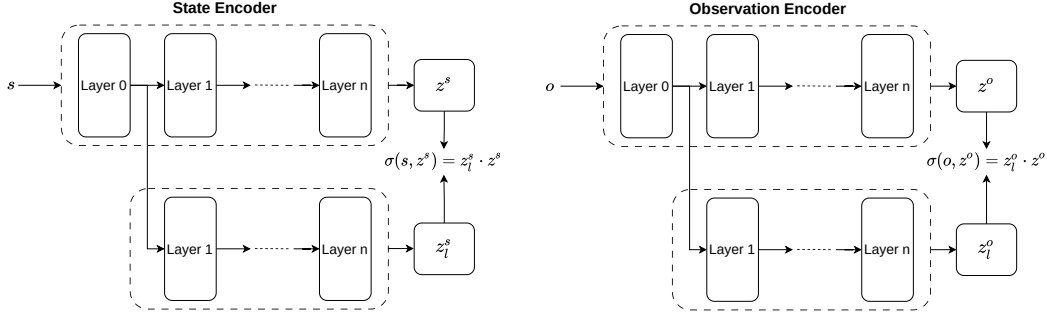

Figure 28: Architecture to calculate  $\sigma(s, E(s))$  and  $\sigma(o, E(o))$  using the dot product operation.

547 From the lower bound equation Eq. (3), we minimize the following loss:

$$\mathcal{L}_{\text{DIM}} = \frac{1}{B^2} \sum_{i=1}^B \sum_{j=1}^B [\text{sp}(-\sigma(x_i, E(x_i))) + \text{sp}(\sigma(x_j, E(x_i)))] \quad (8)$$

548 As shown in Fig. 28, the discriminator  $\sigma$  uses the same architecture of the state encoder  $\phi$  (when  
 549 calculating the state feature  $z_l^s$  of  $s$ ) and the observation encoder  $\psi$  (when calculating the observation  
 550 feature  $z_l^o$  of  $o$ ). We dot product to compute  $\sigma(s, E(s)) = z_l^s \cdot z^s$  and  $\sigma(o, E(o)) = z_l^o \cdot z^o$ .

### 551 C.4 Hyper-parameters

552 We provide the hyper-parameters used for training representations in Table 3.

Table 3: Hyper-parameters used in learning representation. HH: Heaven-Hell, S: Sphinx, CF: CarFlag-2D, BP: Block-Pulling, BPs: Block-Pushing, and DO: Drawer-Opening.

| Domain                                                       | HH    | CF    | S     | BP    | BPs   | DO    |
|--------------------------------------------------------------|-------|-------|-------|-------|-------|-------|
| # of samples                                                 | 21785 | 45406 | 13682 | 1226  | 1240  | 1234  |
| # of episodes                                                | 500   | 1000  | 500   | 80    | 80    | 80    |
| # of augmentations per sample                                | -     | -     | -     | 4     | 12    | 6     |
| # of training epochs                                         | 1000  | 1000  | 1000  | 1000  | 1000  | 1000  |
| Batch size $B$                                               | 500   | 500   | 500   | 500   | 500   | 500   |
| Learning rate                                                | 0.003 | 0.001 | 0.001 | 0.001 | 0.001 | 0.001 |
| Reward loss coeff. $\lambda_r$                               | 10.0  | 1.0   | 10.0  | 10.0  | 100.0 | 100.0 |
| State loss coeff. $\lambda_s$                                | 1.0   | 1.0   | 0.5   | 0.1   | 1.0   | 1.0   |
| Observation loss coeff. $\lambda_o$                          | 0.5   | 5.0   | 0.03  | 1.0   | 1.0   | 1.0   |
| $\downarrow I(z^s; z^o)$ loss coeff. $\lambda_{\text{CLUB}}$ | 1.0   | 10.0  | 0.3   | 10.0  | 0.001 | 1.0   |
| $\uparrow I(s; z^s)$ loss coeff. $\lambda_{\text{DIM}}$      | 0.0   | 0.0   | 0.0   | 0.1   | 0.01  | 0.001 |
| $\uparrow I(o; z^o)$ loss coeff. $\lambda_{\text{DIM}}$      | 1.0   | 1.0   | 0.5   | 1.0   | 1.0   | 1.0   |

## 553 D Additional Experiments

### 554 D.1 Using $z^s \oplus z^o$ versus $z^s$ for Task Learning

555 Continuing the experiment from Section 5.2.1, we report the performance using  $z^s$  and  $z^s \oplus z^o$  for  
 556 task learning in all domains.

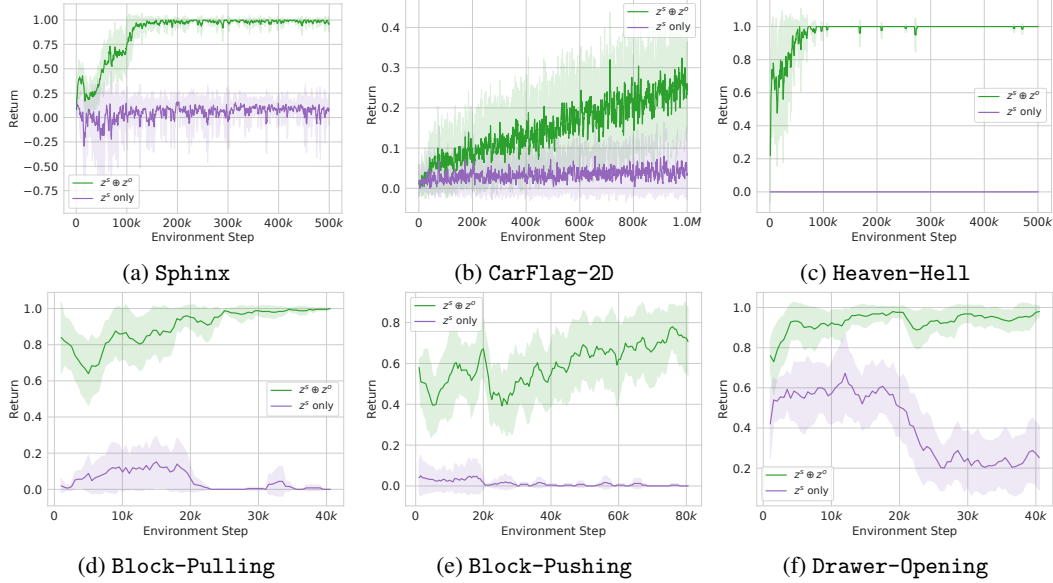

Figure 29: Task learning performance when using  $z^s$  and  $z^s \oplus z^o$  as the “state”.

### 557 D.2 Using Only Auxiliary Task/Intrinsic Rewards

Here, we show the learning performance when using intrinsic rewards and/or the auxiliary task.

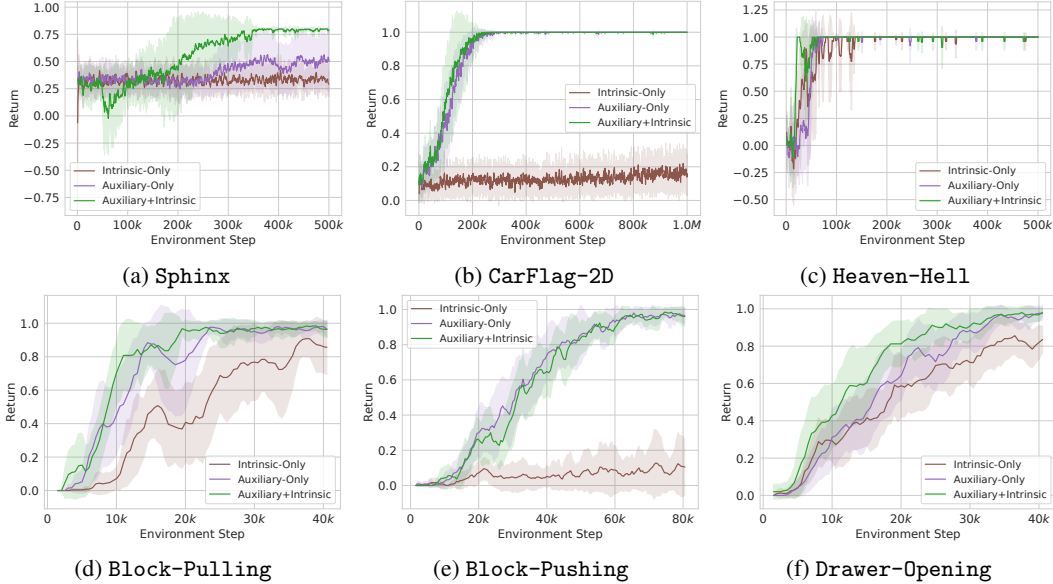

Figure 30: Comparing using intrinsic rewards or the auxiliary task versus using both.

### 559 D.3 Using GRU v.s. GPT

560 Here, we report the performance in all domains when using a GRU versus GPT as the sequence model in our proposed agent.

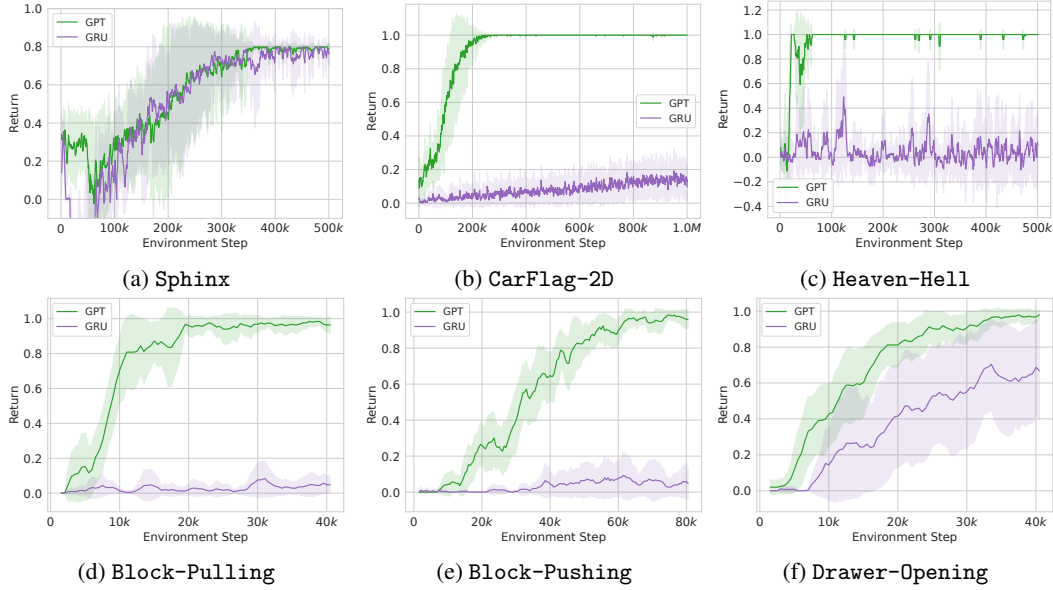

Figure 31: Task learning performance when using a GRU v.s. GPT.

561

### 562 D.4 Visualization of Intrinsic Rewards

563 We visualize the intrinsic rewards of trained agents in three grid-world domains in Fig. 32. The  
 564 intrinsic rewards peak when the agents perform the information-gathering actions.

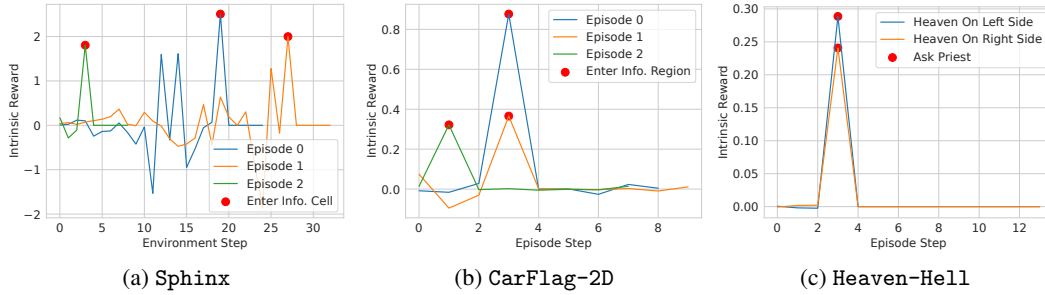

Figure 32: Intrinsic rewards within an episode of trained agents in three grid-world domains. Red circles denote when the intrinsic rewards peak, e.g., when they perform informative actions.

## 565 E Details of Hardware Experiments

### 566 E.1 Obtaining Depth Images

567 We fuse the point clouds from two RealSense D455 cameras (Cam 1 and Cam 2) and one Azure  
 568 Kinect camera (Cam 3) to create an integrated point cloud (see Fig. 33). We then orthographically  
 569 project the point cloud at the gripper’s position to create a depth image observation. Examples of  
 570 observations in the three robot domains can be seen in Fig. 34.

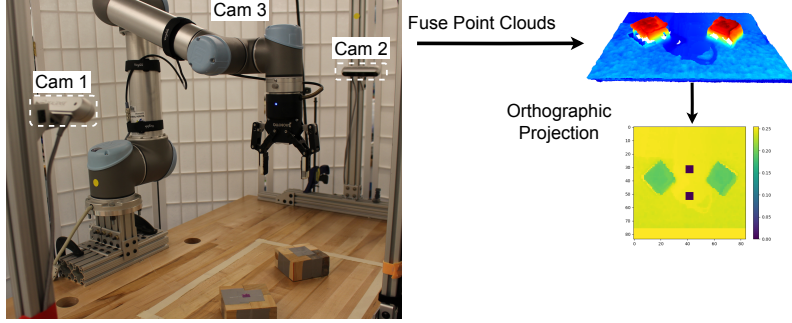

Figure 33: We fuse the point clouds from three cameras (to avoid occlusions) and performed an orthographic projection at the gripper’s position to create a depth image observation.

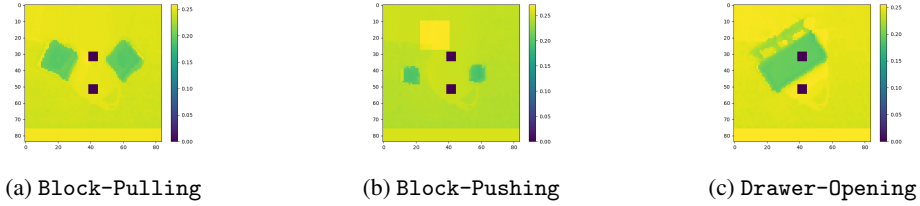

Figure 34: Examples of observations in real robot experiments.

## 571 E.2 Added Perlin Noise for Better Sim-To-Real Transfers

572 Following [38], we found it useful for better sim-to-real transfers by adding the Perlin [45] noise to  
 573 the depth images during training for more robust policies by being closer to real-world depth images.  
 For all robot domains, we applied the noise with a magnitude of 7mm (see Fig. 35).

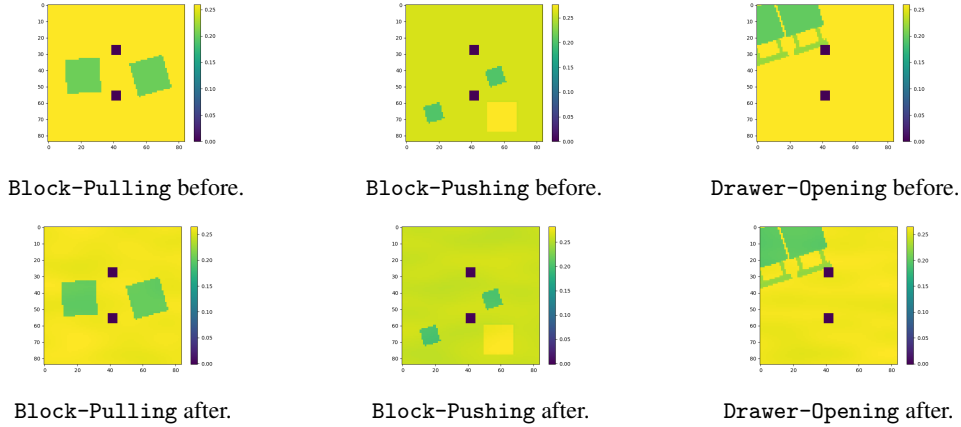

Figure 35: Depth images before and after adding Perlin [45] noise for better sim-to-real transfers.

574

## 575 F Details of SO(2) Rotational Augmentation

576 We perform SO(2) rotational augmentation by choosing a random angle and rotating the depth im-  
 577 ages around its center. We perform this augmentation in two cases:

578 **When learning the representations to utilize the data better.** For each transition  $(s, o, a, r, s', o')$ ,  
 579 we sample a random angle and rotate  $s, o, s', o'$  at the same angle. Each transition has its own  
 580 random angle, see Fig. 36 for examples.

581 **When performing task learning robot domains.** Given an episode, we first sample a random angle  
 582 and apply the rotation with this angle for *every*  $s, o, s', o'$  within the episode. Because we are trying  
 583 to learn a history-based policy, this is to ensure the augmented history is valid (see Fig. 37).

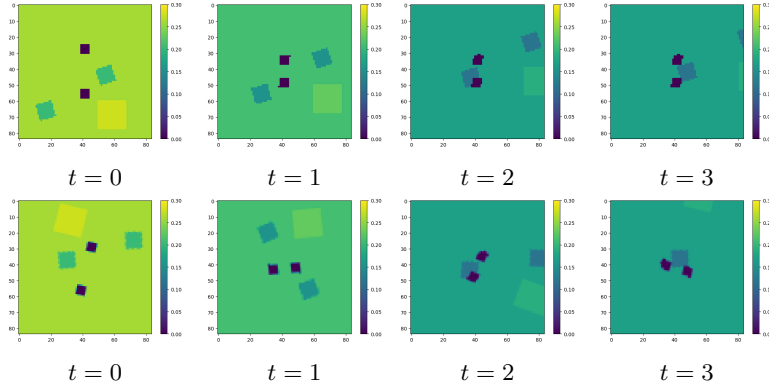

Figure 36: Examples of rotation data augmentation applied for transitions in an episode in Block-Pushing to augment the data for learning the representation: a *different* random rotation is applied independently for  $s, o, s', o'$  in each timestep in an episode.

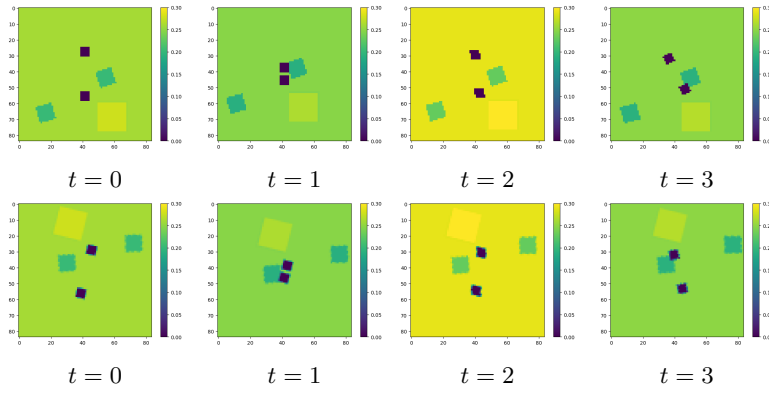

Figure 37: Examples of rotation data augmentation applied for an episode in Block-Pushing: the *same* random rotation is consistently applied to every  $s, o, s', o'$  within an episode.
